# Supplementary material
Source: HighWire-hosted journal article supplement (https://bmjopen.bmj.com/content/12/7/e062698)
Supplement: inline-supplementary-material-1 [file inline-supplementary-material-1.pdf]

| Site of Data collection                                                              | Names and Grades (at time of data collection) of contributors                                                                      |
|--------------------------------------------------------------------------------------|------------------------------------------------------------------------------------------------------------------------------------|
| Birmingham Heartlands Hospital, University Hospitals Birmingham NHS Foundation Trust | Amy Chue, SpR<br>Ed Moran, Consultant<br>Karishma Gokani, CMT                                                                      |
| North Manchester General Hospital                                                    | Joseph Thompson, SpR<br>Katherine Ajdukiewicz, Consultant                                                                          |
| Oxford University Hospitals                                                          | Victoria Ward, SpR<br>Lucinda Barrett, Consultant                                                                                  |
| Cheltenham General Hospital                                                          | Frances Edwards, CMT<br>Adam Usher, Consultant                                                                                     |
| Royal Alexandra Hospital, Paisley                                                    | Mairi McLeod, Consultant<br>Ramandeep Singh, medical student<br>Su su Htwe, SpR                                                    |
| Leicester Royal Infirmary, Leicester                                                 | Benedict Rogers, SpR<br>Grace Duane, Medical Student<br>Martin Wiselka, Consultant<br>Nicholas Wong, SpR                           |
| NHS Lothian                                                                          | Elen Vink, SpR<br>Jennifer Poyner, SpR<br>Jenni Crane, Consultant<br>Ollie Lloyd, SpR<br>Emma Chisholm, SpR                        |
| Countess of Chester Hospital                                                         | Ildiko Kustos, Consultant<br>Ruth McEwen, Consultant<br>Sam Sutton, CMT                                                            |
| University Hospitals Plymouth Trust                                                  | Lewis Jones, Consultant<br>Robert Tilley, Consultant                                                                               |
| Addenbrookes hospital, Cambridge University Hospitals NHS Foundation Trust           | M. Estee Torok, Honorary Consultant<br>Isobel Ramsay, SpR                                                                          |
| Hull University Teaching Hospitals NHS Trust                                         | Monica Ivan, Consultant<br>Joshua York<br>Jennifer Ansett<br>Maithili Varadarajan<br>Celestine Eshiwe, SpR                         |
| London King's College                                                                | Amanda Fife, Consultant<br>Stephanie Harris, SpR<br>Ryan Jayesinghe, medical student<br>Priya Sekhon                               |
| Aintree University Hospital, Liverpool                                               | James Cruise, SpR<br>Susan Larkin, Consultant                                                                                      |
| Worcestershire Royal Hospital                                                        | Shivani Kanabar, Medical student<br>Ernest Mutengesa, Medical Student<br>Mirella Ling, Consultant<br>Christopher Green, Consultant |
| Bristol Royal Infirmary, University Hospitals Bristol NHS Foundation Trust           | Martin Williams, Consultant<br>Matthew Stevens, CMT                                                                                |

|                                                                               |                                                                                                                                                                       |
|-------------------------------------------------------------------------------|-----------------------------------------------------------------------------------------------------------------------------------------------------------------------|
| Victoria hospital, Kirkcaldy                                                  | David Griffith, Consultant<br>Naomi Bulteel, SpR                                                                                                                      |
| Northumbria Healthcare NHS Foundation Trust                                   | Charlotte Milne, SpR<br>Jayanta Sarma, Consultant                                                                                                                     |
| Ninewells hospital, Dundee                                                    | Aline Wilson, SpR<br>John Shone, Consultant<br>Lynn Urquhart, Consultant<br>Sahar Eldirdiri, SpR                                                                      |
| Royal Preston Hospital, Lancashire Teaching Hospitals NHS Foundation Trust    | Alison Muir, Consultant<br>Leila White, Clinical Scientist                                                                                                            |
| Sheffield teaching Hospitals                                                  | Jody Aberdein, Consultant<br>Phillip Simpson, SpR                                                                                                                     |
| Shrewsbury and Telford Hospital NHS Trust                                     | Hnin Hay Mar<br>John Bowen<br>Keying Tan<br>Eint Shwe Zin thein<br>Mahmoud Aziz                                                                                       |
| University Hospital North Midlands                                            | Anthony Cadwgan, Consultant<br>Brendan Davies, Consultant<br>Daniel White, SpR<br>Natasha Weston, SpR<br>Salman Zeb, CMT                                              |
| St George's Hospital, London                                                  | Angela Houston, Consultant<br>Imogen Fordham, clinical fellow<br>Terry John Evans, SpR<br>Louise Wootton, Physician's associate                                       |
| Nottingham University Hospitals NHS Trust                                     | David Turner, Consultant<br>Iona Willingham, SpR                                                                                                                      |
| Birmingham Queen Elizabeth Hospital                                           | Aimee Johnson, SpR<br>Nimal Wickramasinghe, Consultant                                                                                                                |
| Salford Royal Infirmary, Salford                                              | Ashley Horsley, SpR<br>Eamonn Trainor, Consultant<br>Olivier Gaillemin, Consultant                                                                                    |
| University Hospital Southampton NHS Foundation Trust                          | Andrew Rosser, Consultant<br>Nicholas J Norton, SpR                                                                                                                   |
| Royal Blackburn Hospital, East Lancashire Hospitals NHS Trust                 | Iain Crossingham, Consultant<br>Katie Cheung, Medical Student<br>Megan Duxbury, CMT                                                                                   |
| Queen Elizabeth University Hospital, NHS Greater Glasgow and Clyde            | Ashutosh Deshpande, Consultant<br>Emilie Bellhouse, FY2<br>Kamaljit Khalsa, SpR                                                                                       |
| Imperial College School of Medicine and Imperial college Healthcare NHS trust | Helena Brezovjakova, Medical Student<br>Emma McLean, medical student<br>Tanmay, Kanitkar, CMT<br>Nicholas Davies, Consultant<br>Alexsander Dawidziuk, Medical Student |

|                                                       |                                                                                                        |
|-------------------------------------------------------|--------------------------------------------------------------------------------------------------------|
| St James University hospital, Leeds                   | Eloisa McLaughlin, Medical student<br>Joanna Allen, Consultant<br>Razan Saman, SpR<br>Sarah Kelly, SpR |
| Royal Liverpool University Hospital, Liverpool        | Hugh Adler, SpR<br>Sylviane Defres, Consultant                                                         |
| Arrowe Park Hospital, Wirral                          | David Harvey, Consultant<br>Elshadai Ejere, FY2                                                        |
| Queen's hospital, Romford                             | Aarti Shah, Consultant<br>Yiwen Soo, FY1                                                               |
| Raigmore Hospital, Inverness                          | Wendy Beadles, Consultant<br>Heather Sturgeon, Medical student<br>Brodie Cameron, Medical Student      |
| James Cook University Hospital, Middlesbrough         | Ben Tomlinson, SpR<br>David Chadwick, Consultant                                                       |
| University Hospital Monklands                         | Claire McGoldrick, Consultant<br>Katie McDowell, FY2                                                   |
| Cumberland infirmary, Carlisle                        | Alastair Miller, Consultant<br>Clive Graham, Consultant<br>Mpho Molojiwa, FY2                          |
| Newcastle Upon Tyne NHS Foundation Trust              | Ewan Hunter, Consultant<br>Ruth Owen, Medical Student<br>Katherine Flack                               |
| Airedale hospital, Airedale                           | Adrian Kennedy, Consultant                                                                             |
| Bradford Royal Infirmary, Bradford                    | Amy Robinson, Consultant<br>Phoebe Cross, SpR<br>Fay Perry                                             |
| University Hospital Wales                             | Vithusha Inpadhas                                                                                      |
| Aberdeen Royal Infirmary                              | Ali Khan, SpR<br>Sarathy Selvam, FY2<br>Vhairi Bateman, Consultant<br>Jeremy Wong, Medica Student      |
| Lancaster Royal Infirmary                             | Henry Wu, FY2<br>Monika Pasztor, Consultant                                                            |
| Whittington Hospital, London                          | Trupti Patel, Consultant<br>Ajanthiha Karunakaran, Medical Student                                     |
| Russells Hall Hospital, Dudley                        | Basma Soliman, CT1<br>Hassan Paraiso, Consultant                                                       |
| Glasgow Royal Infirmary                               | Mairi McLeod, Consultant<br>Su su Htwe, SpR<br>Anna Smith                                              |
| James Paget University Hospitals NHS Foundation Trust | Andrew Blanshard, CMT<br>Harish Reddy, Consultant                                                      |
| Portsmouth Hospitals University NHS Trust             | Avneet Shahi, SpR<br>Helen Chesterfield, Consultant<br>Oliver Bannister, CMT                           |

|                                                                                                            |                                                                                             |
|------------------------------------------------------------------------------------------------------------|---------------------------------------------------------------------------------------------|
| Withybush hospital, Haverford West                                                                         | Ben Schroeder, Medical Student<br>Ken Woodhouse, Consultant                                 |
| Ashford and St Peter's NHS Foundation Trust                                                                | Jan Coebergh, Consultant<br>Viva Levee, FY2                                                 |
| Mater Misericordiae University Hospital, Dublin                                                            | Eavan Muldoon, Consultant<br>Rhea O'regan, SPR<br>Tee Keat Teoh, SpR                        |
| Newham Hospital, Barts Health NHS Trust                                                                    | Sathyavani Subbarao, SpR<br>Simon Tiberi, Consultant<br>Caryn Rosmarin                      |
| London UCL and Hospital for Tropical diseases at University College London Hospitals NHS Foundation Trust. | Jayne Ellis, SpR<br>Lucy Bell, CMT<br>Robert Heyderman, Consultant                          |
| Barts Health NHS Trust                                                                                     | Jonathan Lambourne, Consultant<br>Emma McGuire, SpR<br>Robert Serafino, Consultant          |
| Guy's and St Thomas' NHS Foundation Trust                                                                  | Anna Goodman, Consultant<br>Ishaan Bhide, FY1<br>Karanjeet Sagoo, Medical Student           |
| Whipps Cross, Barts Health NHS Trust                                                                       | Mark Melzer, Consultant<br>Maria Krutikov, SpR                                              |
| The Royal Free Hospital, London                                                                            | Indran Balakrishnan, Consultant<br>Susan Hopkins, Consultant<br>Tim Jones, SpR              |
| Trafford General Hospital, Manchester University NHS Foundation Trust                                      | Kajal Patel, Medical Student<br>Barzo Faris, Consultant                                     |
| William Harvey Hospital, East Kent                                                                         | Graeme Calver, Consultant<br>Ricky Singh, Medical Student<br>Hazel Sanghvi, Medical Student |
| Tameside General Hospital                                                                                  | Mohamed Eltayeb, Clinical Fellow<br>Rathur Haris, Consultant                                |
